# Supplementary material for: Increased Circulating Cathepsin K in Patients with Chronic Heart Failure
Source: PubMed Central journal article supplement (PMC4547812; doi:10.1371/journal.pone.0136093), 2015-08-24

S1\_Fig.

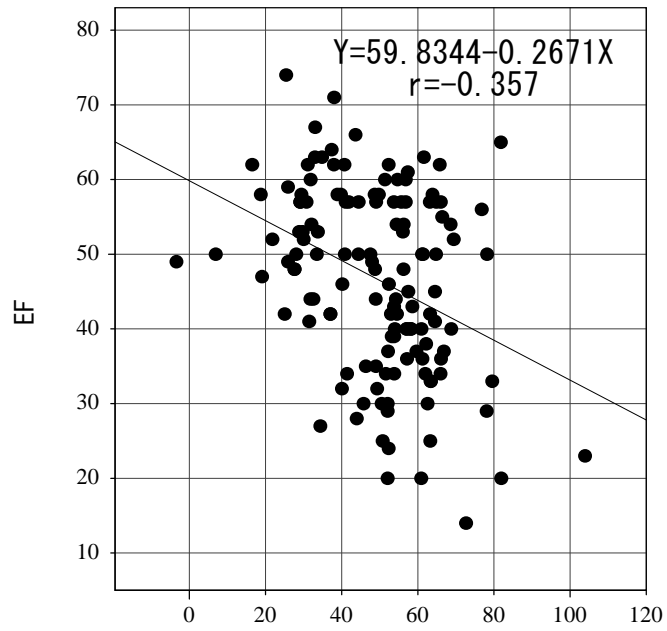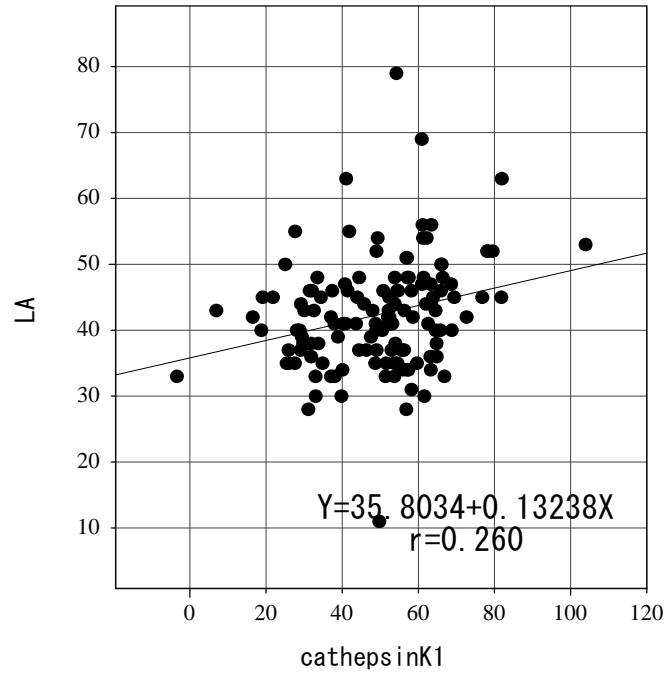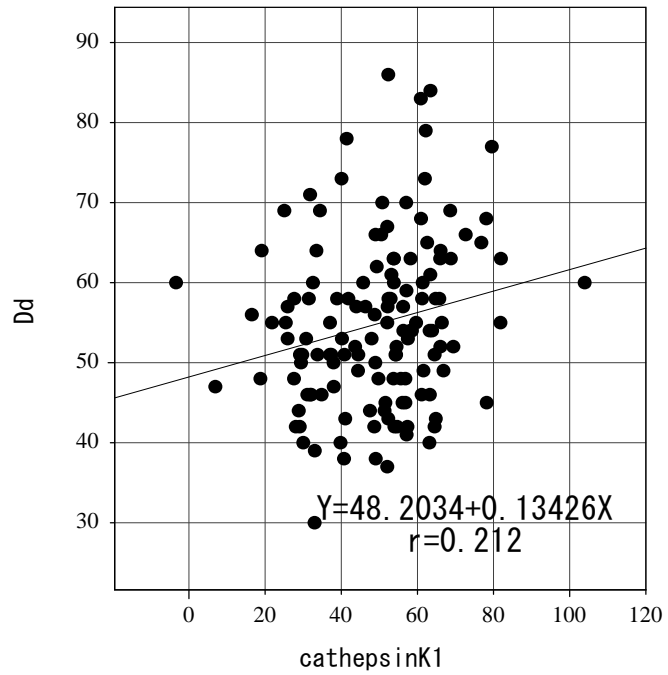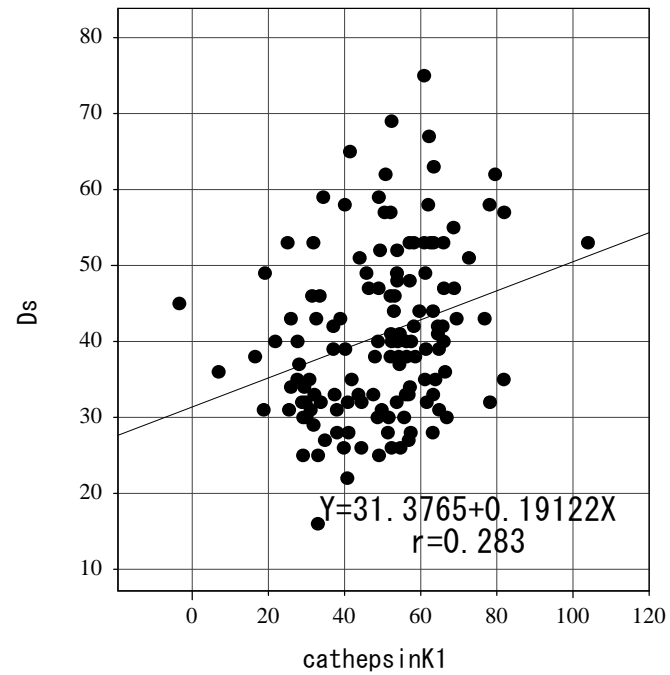

Supplement: pone.0136093.s001.pdf [file pone.0136093.s001.pdf]
