# Supplementary material for: Increased Circulating Cathepsin K in Patients with Chronic Heart Failure
Source: PubMed Central journal article supplement (PMC4547812; doi:10.1371/journal.pone.0136093), 2015-08-24
Supplement: pone.0136093.s002.pdf [file pone.0136093.s002.pdf]

**S1\_Table.** Patients' characteristics

|                                    |             |
|------------------------------------|-------------|
| Age, yrs                           | 66.5 ± 12.9 |
| Female, %                          | 62/134      |
| Body mass index, kg/m <sup>2</sup> | 23.3 ± 3.1  |
| <b>NYHA functional class (n)</b>   |             |
| II                                 | 17          |
| III                                | 37          |
| VI                                 | 70          |
| <b>Echocardiography</b>            |             |
| LAD, mm                            | 42.3 ± 8.4  |
| IVST, mm                           | 9.3 ± 1.2   |
| LVPWT, mm                          | 12.9 ± 2.0  |
| LVDd, %                            | 55.9 ± 14.5 |
| LVSd, %                            | 48.7 ± 11.9 |
| LVEF, %                            | 41.9 ± 8.3  |
| CI, %                              | 2.8 ± 1.1   |
| <b>Blood Examination</b>           |             |
| Na <sup>+</sup> , mmol/L           | 139.9 ± 3.7 |
| LDL, mg/dL                         | 90.7 ± 31.0 |
| HDL, mg/dL                         | 45.5 ± 16.2 |
| Hemoglobin A1c, %                  | 5.9 ± 1.4   |
| Creatinine, mmol/L                 | 75.0 ± 32.2 |
| hs-CRP, mg/dL                      | 4.8 ± 7.2   |
| NTproBNP (pg/mL)                   | 4024 ± 4026 |
| Troponin I (pg/mL)                 | 1.5 ± 4.6   |
| CatK, ng/mL                        | 51.6 ± 16.6 |

Values are expressed as mean ± SD or number (%).

LAD, left atrial dia.; LV, left ventricular; IVST, interventricular septal thickness; LVPWT, LV posterior wall thickness; LVDd, left ventricular end-diastolic dimension; LVSd; LV end-systolic dimension; CI, cardiac index; LDL, low-density lipoprotein; HDL, high-density lipoprotein; hs-CRP, high-sensitivity C-reactivity protein; NTproBNP, N-terminal pro-brain natriuretic peptide; ACEI, angiotensin-converting enzyme inhibitor; ARB, angiotensin type 1 receptor blocker.
