# Supplementary material for: Increased Circulating Cathepsin K in Patients with Chronic Heart Failure
Source: PubMed Central journal article supplement (PMC4547812; doi:10.1371/journal.pone.0136093), 2015-08-24
Supplement: pone.0136093.s003.pdf [file pone.0136093.s003.pdf]

**S2\_Table.** Comparison of each parameter between the lowLVEF and highLVEF groups

|                                     | <b>lowLVEF (n=44)</b> | <b>highLVEF (n=90)</b> | <b>P-value</b> |
|-------------------------------------|-----------------------|------------------------|----------------|
| Age, yrs                            | 63.1 ± 13.2           | 69.8 ± 10.9            | 0.09           |
| Female, n                           | 34.1                  | 57.8                   | 0.01           |
| Body mass index, kg/m <sup>2</sup>  | 23.6 ± 3.6            | 22.9 ± 4.0             | 0.60           |
| <b>Clinical histories</b>           |                       |                        |                |
| Hypertension, n                     | 17                    | 28                     | 0.12           |
| Diabetes mellitus, n                | 12                    | 20                     | 0.52           |
| Current smokers, n                  | 15                    | 29                     | 0.83           |
| Previous myocardial infarction, n   | 16                    | 31                     | 0.86           |
| Previous angioplasty, n             | 3                     | 15                     | 0.019          |
| Previous bypass surgery, n          | 0                     | 0                      | 0              |
| Previous cerebrovascular disease, n | 1                     | 16                     | 0.011          |
| <b>Echocardiography</b>             |                       |                        |                |
| LAD, mm                             | 44.9 ± 8.0            | 41.0 ± 8.3             | 0.000          |
| IVST, mm                            | 8.9 ± 1.3             | 9.6 ± 1.2              | 0.12           |
| LVPWT, mm                           | 11.3 ± 1.9            | 13.7 ± 1.6             | 0.08           |
| LVDd, %                             | 62.8 ± 11.1           | 50.9 ± 7.5             | 0.000          |
| LVSd, %                             | 55.4 ± 10.0           | 43.9 ± 3.6             | 0.000          |
| LVEF, %                             | 32.3 ± 6.5            | 46.6 ± 3.8             | 0.021          |
| CI, %                               | 2.6 ± 1.2             | 2.9 ± 0.7              | 0.33           |
| <b>Blood Examination</b>            |                       |                        |                |
| Na <sup>+</sup> , mmol/L            | 139.8 ± 4.4           | 140.0 ± 3.4            | 0.74           |
| LDL, mg/dL                          | 90.5 ± 32.5           | 91.3 ± 28.1            | 0.81           |
| HDL, mg/dL                          | 44.9 ± 15.4           | 46.7 ± 17.9            | 0.77           |
| Hemoglobin, g/dL                    | 12.9 ± 2.2            | 14.6 ± 2.3             | 0.09           |
| Serum albumin, g/mL                 | 39.9 ± 5.1            | 40.5 ± 4.1             | 0.51           |
| Hemoglobin A1c, %                   | 6.1 ± 1.4             | 5.8 ± 0.4              | 0.38           |
| Creatinine, mmol/L                  | 77.4 ± 24.3           | 73.9 ± 35.4            | 0.56           |
| hs-CRP, mg/dL                       | 4.3 ± 4.1             | 5.4 ± 8.4              | 0.39           |
| NTproBNP (pg/mL)                    | 4269 ± 3757           | 3599 ± 4225            | 0.68           |
| Troponin I (pg/mL)                  | 2.1 ± 7.6             | 1.5 ± 2.3              | 0.21           |
| CatK, ng/mL                         | 58.4 ± 12.2           | 44.7 ± 16.4            | 0.000          |
| <b>Medications</b>                  |                       |                        |                |
| ACEIs, n                            | 17                    | 34                     | 0.92           |
| ARBs, n                             | 21                    | 31                     | 0.14           |

|                   |    |    |       |
|-------------------|----|----|-------|
| β-blockers, n     | 33 | 64 | 0.64  |
| Statins, n        | 28 | 58 | 0.64  |
| MR antagonists, n | 34 | 51 | 0.02  |
| Diuretics, n      | 31 | 50 | 0.020 |
| Digoxin, n        | 12 | 14 | 0.013 |
| Insulin, n        | 5  | 16 | 0.19  |

---

Values are expressed as mean ± SD or number (%).

LDL, low-density lipoprotein; HDL, high-density lipoprotein; hs-CRP, high-sensitivity C-reactivity protein; NTproBNP, N-terminal Pro-brain Natriuretic Peptide; ACEI, angiotensin-converting enzyme inhibitor; ARB, angiotensin type 1 receptor blocker; MR, mineralocorticoid receptor.
