# Supplementary material for: Increased Circulating Cathepsin K in Patients with Chronic Heart Failure
Source: PubMed Central journal article supplement (PMC4547812; doi:10.1371/journal.pone.0136093), 2015-08-24
Supplement: pone.0136093.s004.pdf [file pone.0136093.s004.pdf]

**S3\_Table.****Association with CHF**

|                          | Single              |           |                |
|--------------------------|---------------------|-----------|----------------|
|                          | Odds Ratio Estimate | 95% CI    | <i>P</i> value |
| Age(year)                | 1.05                | 1.02-1.08 | 0.0037         |
| gender                   | 0.38                | 0.18-0.80 | 0.0111         |
| BMI (kg/m <sup>2</sup> ) | 0.97                | 0.89-1.07 | 0.60           |
| Diabetes mellitus (%)    | 0.76                | 0.33-1.75 | 0.52           |
| Hypertension (%)         | 3.91                | 1.83-8.35 | 0.0004         |
| LAD (mm)                 | 0.94                | 0.90-0.99 | 0.0155         |
| LVDd (mm)                | 0.86                | 0.82-0.91 | 0.0000         |
| hs-CRP                   | 1.01                | 0.98-1.03 | 0.59           |
| Troponin I (pg/mL)       | 0.98                | 0.93-1.04 | 0.50           |
| CatK                     | 0.94                | 0.91-0.97 | 0.0000         |

The odds ratios corresponding to 1 SD increase in each measure of the indicated parameters were estimated. Abbreviations are as in Table 1. CI = confidence interval.
