# Supplementary material for: Increased Circulating Cathepsin K in Patients with Chronic Heart Failure
Source: PubMed Central journal article supplement (PMC4547812; doi:10.1371/journal.pone.0136093), 2015-08-24
Supplement: pone.0136093.s005.pdf [file pone.0136093.s005.pdf]

**S4\_Table.** Independent predictors of CHF according to the multivariable logistic regression analysis

|              | <b>OR Estimate</b> | <b>95%CI</b> | <b>P-value</b> |
|--------------|--------------------|--------------|----------------|
| Age          | 0.06               | 0.05–1.04    | 0.18           |
| Gender       | 0.22               | 0.97–1.08    | 0.29           |
| Hypertension | 4.11               | 1.08–15.69   | 0.0013         |
| LAD          | 1.13               | 1.01–1.25    | 0.010          |
| LVDd         | 1.20               | 1.05–1.37    | 0.000          |
| CatK         | 0.90               | 0.84–0.95    | 0.000          |

Abbreviations are as in Table 1.
